# Supplementary material for: An Immunosenescence-Related Gene Signature to Evaluate the Prognosis, Immunotherapeutic Response, and Cisplatin Sensitivity of Bladder Cancer
Source: Hindawi journal article supplement (doi:10.1155/2022/2143892), 2022-03-02
Supplement: f3 [file 2143892.f3.pdf]

**Supplementary Table 3** The primer sequence utilized in this study.

| Gene    | Sequence (5' -3')                                                   |
|---------|---------------------------------------------------------------------|
| EGFR    | Forward:AGGCACGAGTAACAAGCTCAC<br>Reverse:ATGAGGACATAACCAGCCACC      |
| TFRC    | Forward:ACCATTGTCATATAACCCGGTTCA<br>Reverse:CAATAGCCCAAGTAGCCAATCAT |
| ADIPOR2 | Forward:CTGGATGGTACACGAAGAGGT<br>Reverse:TGGGCTTGTAAGAGAGGGGAC      |
| CTSS    | Forward:AAACGGCTGGTTTGTGTGC<br>Reverse:CAGTGGTGATCCAGGGTAGG         |
| GBP2    | Forward:CTATCTGCAATTACGCAGCCT<br>Reverse:TGTTCTGGCTTCTGGGATGA       |
| PSMD11  | Forward:GCCTCCATCGACATCCTCC<br>Reverse:GAGCTGCTTTAGCCTTGCTG         |
| KIR2DL4 | Forward:GTGGGTTTAAACATCTTCACGCT<br>Reverse:AGCATCTGTAGGTCTCTCCGT    |
| MAP2K1  | Forward:CAATGGCGGTGTGGTGTTC<br>Reverse:GATTGCCGGTTTGATCTCCAG        |
| MAPK1   | Forward:TACACCAACCTCTCGTACATCG<br>Reverse:CATGTCTGAAGCGCAGTAAGATT   |
| IRF1    | Forward:ATGCCCATCACTCGGATGC<br>Reverse:CCCTGCTTTGTATCGGCCTG         |
| THBS1   | Forward:GCCATCCGCACTAACTACATT<br>Reverse:TCCGTTGTGATAGCATAGGGG      |
| CCN2    | Forward:CAGCATGGACGTTCTGTCTG<br>Reverse:AACCACGGTTTGGTCCTTGG        |
| SRC     | Forward:GAGCGGCTCCAGATTGTCAA<br>Reverse:CTGGGGATGTAGCCTGTCTGT       |
| NOX4    | Forward:CAGATGTTGGGGCTAGGATTG<br>Reverse:GAGTGTTCGGCACATGGGTA       |
| ELAVL1  | Forward:GGGTGACATCGGGAGAACG<br>Reverse:CTGAACAGGCTTCGTAACATCAT      |
| GAPDH   | Forward:GGAGCGAGATCCCTCCAAAAT<br>Reverse:GGCTGTTGTCATACTTCTCATGG    |
