# Supplementary material for: An Immunosenescence-Related Gene Signature to Evaluate the Prognosis, Immunotherapeutic Response, and Cisplatin Sensitivity of Bladder Cancer
Source: Hindawi journal article supplement (doi:10.1155/2022/2143892), 2022-03-02
Supplement: f7 [file 2143892.f7.pdf]

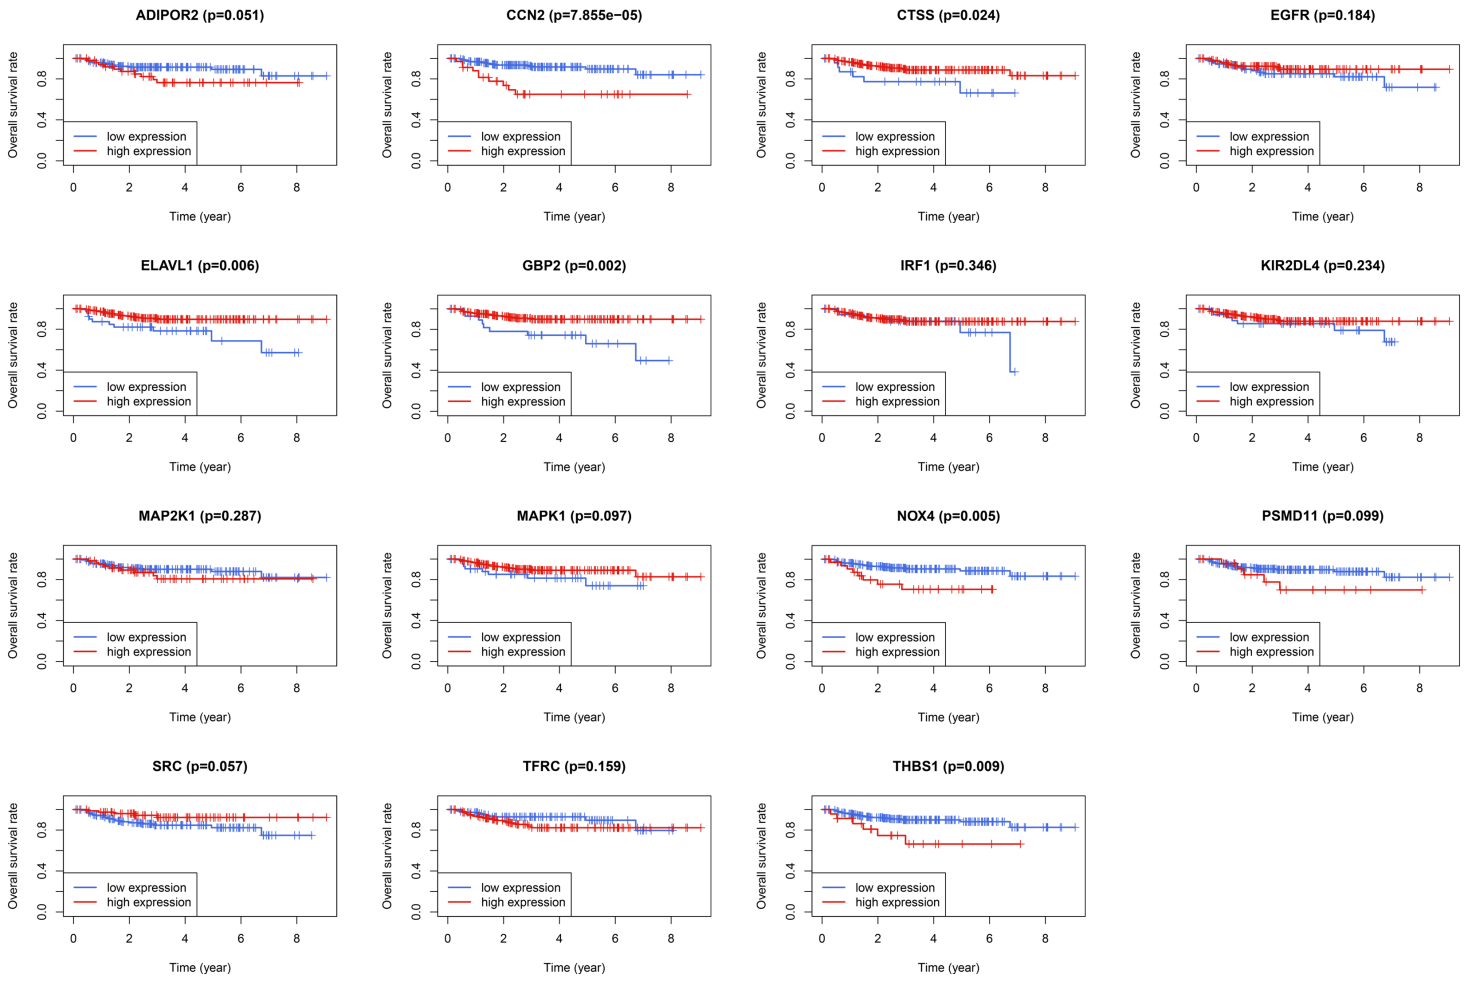

Supplementary Figure 4 The predictive value of the 15 genes to OS in the GSE32894 cohort.
