# Supplementary material for: An Immunosenescence-Related Gene Signature to Evaluate the Prognosis, Immunotherapeutic Response, and Cisplatin Sensitivity of Bladder Cancer
Source: Hindawi journal article supplement (doi:10.1155/2022/2143892), 2022-03-02
Supplement: f8 [file 2143892.f8.pdf]

**a**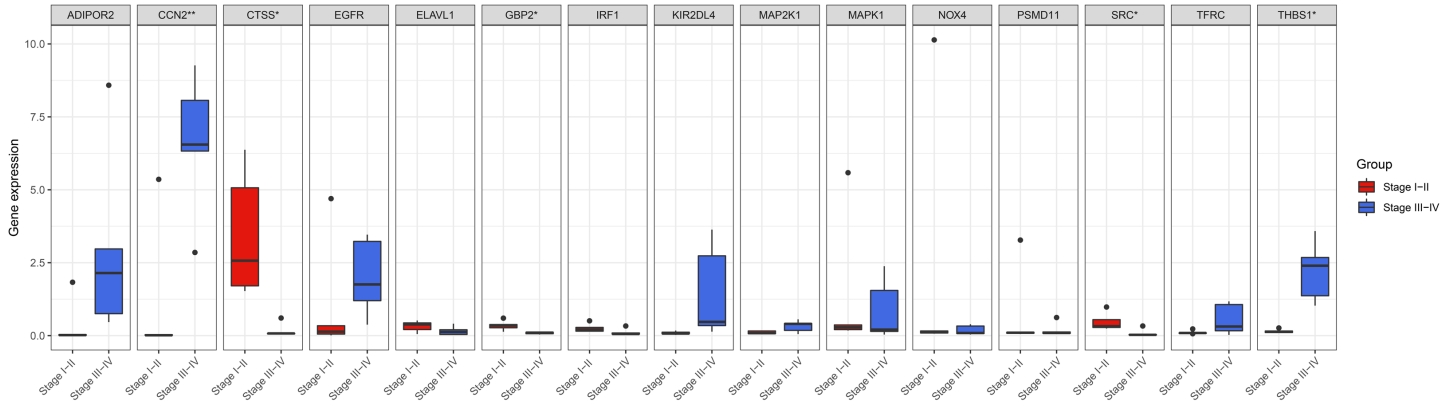**b**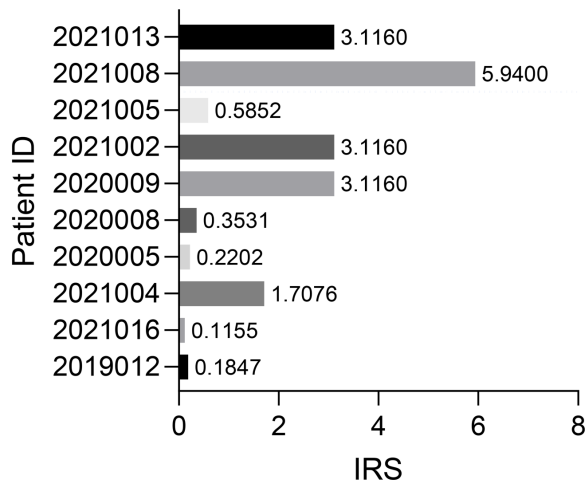**c**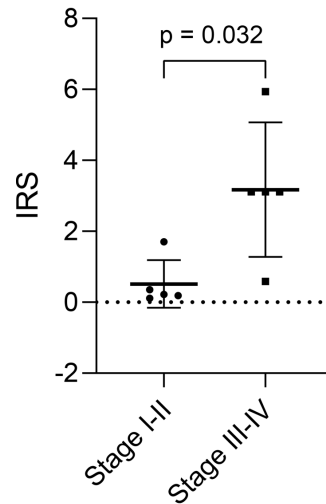

Supplementary Figure 5 Validation of the prognostic value of IRS in the local cohort. (a) The expression level of the 15 genes in the risk signature in the subjects with BCa in stage I-II and the subjects with BCa in stage III-IV. (b) The calculated IRS of each patient. (c) The patients in stage III-IV exhibited higher IRS level compared with those in stage I-II.
